# Supplementary material for: Use of a fluorous bridge for diffusion controlled uptake of molecular chlorine in chlorine addition to alkenesElectronic supplementary information (ESI) available: experimental. See http://www.rsc.org/suppdata/cc/b3/b305629e/
Source: Royal Society of Chemistry journal article supplement (doi:10.1039/b305629e), 2003-01-01
Supplement: b305629e.doc [file b305629e.doc]

**Experimental section**

NMR spectra were recorded at Varian Inova spectrometer at 60MHz and 300MHz with TMS (for 1H) and CDCl3 (for 13C) as internal standards and in CDCl3 as solvent. Flash chromatography was performed on Merck silica gel 60 with a mixture hexane:CH2Cl2 (9:1).

**Typical experiment**: A U-tube was charged with 10mL of perfluoro-*n*-octane (FC-77). On the reaction side of the U-tube was added 1mL of 2M solution of alkene and tube was closed. On the storage side of the U-tube chlorine line was connected and a slight pressure of chlorine was applied. Fluorous phase was stirred while care was taken not to mix two phases. With a consumption of chlorine pressure in the storage phase decreased and a valve of chlorine line was opened again to introduce new portion of Cl2. When colour of the reaction phase started to turn yellow, the organic phase was taken out, washed with diluted solution of NaHSO3, sat. sol. of NaHCO3 and dried over Na2SO4. Crude reaction product was analysed by NMR spectroscopy and purified by flash chromatography (SiO2, hexane).

**1,2-dichlorocyclooctane** (Table 2, entry 1)[[1]](#endnote-2): colourless oil; 1H NMR: *δ*=1.32-2.12 (m, 10 H), 2.22-2.35 (m, 2H), 4.28 (m, 2H); 13C NMR: 25.00, 25.38, 33.23, 68.07.

**1,2-dichlorocyclohexane** (Table 2, entry 2)[[2]](#endnote-3): colourless oil; 1H NMR: *δ*=1.33-1.51 (m, 2 H), 1.65-1.89 (m, 4H), 2.25-2.44 (m, 2H), 3.98-4.07 (m, 2H); 13C NMR: 23.02, 33.38, 63.15.

**1,2-dichloro-1-phenylethane** (Table 2, entry 3)[[3]](#endnote-4): colourless oil; 1H NMR: *δ*=3.91 (dd, 2J(H,H)=11.3Hz, 3J(H,H)=7.9Hz, 1H), 3.98 (dd, 2J(H,H)=11.3Hz, 3J(H,H)=6.7Hz, 1H), 4.98 (dd, 3J(H,H)=7.9Hz and 6.7Hz, 1H), 7.25-7.50 (m, 5H); 13C NMR: 48.30, 61.71.

**1,2-dichloro-1-phenylpropane** (Table 2, entry 4)[[4]](#endnote-5): colourless oil;

*anti*: 1H NMR: *δ*=1.72 (d, 3J(H,H)=6.5Hz, 3H), 4.43 (m, 1H), 4.93 (d, 3J(H,H)=7.8Hz, 1H), 7.30-7.52 (m, 5H). *syn*: 1H NMR: *δ*=1.47 (d, 3J(H,H)=6.7Hz, 3H), 4.43 (m, 1H), 5.01 (d, 3J(H,H)=6.1Hz, 1H), 7.30-7.52 (m, 5H).

**1,2-dichloro-1,2,3,4-tetrahydronaphthalene** (Table 2, entry 5)Error: Reference source not found: colourless oil; 1H NMR: *δ*=2.05-3.35 (m, 4 H), 4.69 (m, 1H), 5.26 (d, 3J(H,H)=3.0Hz, 1H), 7.10-7.40 (m, 4H); 13C NMR: 23.81, 24.95, 59.40, 59.69, 126.65, 128.77, 128.99, 129.03, 131.02.

**1,2-dichlorooctane** (Table 2, entry 6)[[5]](#endnote-6): colourless oil; 1H NMR: *δ*=0.89 (t, 3J(H,H)=6.7Hz,3H), 1.24-1.62 (m, 8H), 1.65-1.77 (m, 1H), 1.93-2.05 (m, 1H), 3.65 (dd, 2J(H,H)=11.3Hz, 3J(H,H)=7.4Hz, 1H), 3.76 (dd, 2J(H,H)=11.3Hz, 3J(H,H)=5.1Hz, 1H), 4.03 (m, 1H); 13C NMR:14.01, 22.54, 25.77, 28.64, 31.59, 35.05, 48.23, 61.22.

**4,5-dichlorooctane** (Table 2, entry 7)[[6]](#endnote-7): colourless oil; 1H NMR: *δ*=0.95 (t, 3J(H,H)=7.3Hz,6H), 1.35-1.86 (m, 6H), 1.88-2.00 (m, 2H), 3.99 (m, 2H); 13C NMR:13.46, 19.39, 36.74, 65.83.

**Ethyl 2,3-dichloro-3-phenylpropanoate** (Table 2, entry 8)[[7]](#endnote-8): colourless oil;

*Anti*: 1H NMR: *δ*=1.37 (t, 3J(H,H)=7.1Hz,3H), 4.35 (q, 3J(H,H)=7.1Hz,2H), 4.61 (d, 3J(H,H)=10.6Hz,1H), 5.19 (d, 3J(H,H)=10.6Hz,1H), 7.25-7.45 (m, 5H); 13C NMR: 13.91, 58.96, 62.36, 62.57. Syn: 1H NMR: *δ*=1.07 (t, 3J(H,H)=7.1Hz,3H), 4.05 (q, 3J(H,H)=7.1Hz,2H), 4.65 (d, 3J(H,H)=8.4Hz,1H), 5.29 (d, 3J(H,H)=8.4Hz,1H), 7.25-7.45 (m, 5H); 13C NMR: 13.65, 61.03, 62.57, 63.63.

1. N. B. Barhate, A. S. Gajare, R. D. Wakharkar, A. V. Bedekar, *Tetrahedron* **1999**, *55*, 11127-11142. [↑](#endnote-ref-2)
2. A. M. Morella, A. D. Ward, *Tetrahedron Lett.* **1984**, *25*, 1197-1200. [↑](#endnote-ref-3)
3. W. Adam, C. Mock-Knoblauch; C. R. Saha-Möller, M. Herderich, *J. Am. Chem. Soc.* **2000**, *122*, 9685-9691. [↑](#endnote-ref-4)
4. R. C. Fahey, C. Schubert, *J. Am. Chem. Soc.* **1965**, *87*, 5172-5179.. [↑](#endnote-ref-5)
5. M. S. Dzheiranishvili, M.B. Levinskii, N. G. Chkhubianishvili, I. B. Afanasev, *Zh. Org. Khim.* **1999**, *16*, 516-518. [↑](#endnote-ref-6)
6. M. Schlosser, G. Jan, E. Byrne, J. Sicher, *Helv. Chim. Acta* **1973**, *56*, 1630-1637. [↑](#endnote-ref-7)
7. L. Lebarillier, F. Outurquin, C. Paulmier, *Tetrahedron* **2000**, *56*, 7495-7502. [↑](#endnote-ref-8)
